# Supplementary material for: Establishment of enterotype-specific antibodies for various diagnostic systems
Source: Research Square preprint supplement (doi:10.21203/rs.3.rs-5527334/v1), 2025-05-02
Supplement: Supplementary file 1 [file 38b5c75327814967537797bf.docx]

**Supplementary Information**

Title：

Establishment of enterotype-specific antibodies for various diagnostic systems

Authors：

Ken Yoshii, Eri Node, Mari Furuta, Yoko Tojima, Ayu Matsunaga, Jun Adachi, Narimi Takaai, Makiko Morita, Koji Hosomi, and Jun Kunisawa.

Figure and Table legends for Supplementary Figures and Table:

**Supplementary Fig. 1:** Relative abundance of enterotypes of the human gut microbiome.

Comparison of the relative abundance of enterotypes (*Bacteroides*, *Faecalibacterium*, and *Prevotella*) in the human gut microbiome of Japanese adult participants (n = 300).

**Supplementary Fig. 2:** Reactivity of selected clones with (+) or without (–) bead disruption of bacterial cells based on ELISA.

Comparison of the reactivity of established monoclonal antibodies (mAbs) that were specifically reactive to representative bacteria, with or without bead disruption, of human gut microbiome enterotypes *Phocaeicola vulgatus* JCM5826 and *Faecalibacterium duncaniae* JCM31915, as detected by ELISA. Representative data for selected clones PV-L2B7-117K1, PV-S10F7-14K1, FD-S2D3-18K1, and FD-L4F6-18K2 are shown. Data are the mean ± SD of two independent experiments. Statistical significance was determined using the Mann–Whitney U test. **P*<0.05,***P* <0.01. OD450, optical density at 450 nm.

**Supplementary Fig. 3:** Reactivity and specificity of established monoclonal antibodies based on flow cytometry analysis.

Reactivity and specificity of selected clones (PV-L2B7-117K1, PV-S10F7-14K1, FD-S2D3-18K1, FD-L4F6-18K2, FD-L5B6-33K2, SC-L10B5-35K1, and SC-S10C3-49K1) that were reactive to *Bifidobacterium pseudocatenulatum* JCM1200, *Bifidobacterium longum* subsp. *longum* JCM1217, *Blautia wexlerae* JCM31267, and *Akkermansia muciniphila* JCM33894 as negative controls. Representative histograms are shown for the human gut bacteria strains described abovetreated with (violet, pink, brown or orange) or without (gray) selected clones. Data are representative of two independent experiments. FITC, fluorescein isothiocyanate.

**Supplementary Fig. 4:** Reactivity of PV-L1A6-117K2 monoclonal antibody (mAb) based on ELISA, flow cytometry, and western blotting.

(**A**) ELISA of established mAbs that were specifically reactive to heat-killed representative bacteria of human gut microbiome enterotypes *Phocaeicola vulgatus* JCM5826, *Faecalibacterium duncaniae* JCM31915, and *Segatella copri* JCM13464, but not to other gut bacteria, including *Bifidobacterium pseudocatenulatum* JCM1200, *Bifidobacterium longum* subsp. *longum* JCM1217, *Blautia wexlerae* JCM31267, and *Akkermansia muciniphila* JCM33894. Representative data for the selected clone PV-L1A6-117K2 are shown. Data are the mean ± SD of two independent experiments. Statistical significance was determined using one-way ANOVA. OD450, optical density at 450 nm. (**B**) Reactivity of selected clone PV-L1A6-117K2 to representative bacteria of human gut microbiome enterotypes *Phocaeicola vulgatus* JCM5826, *Faecalibacterium duncaniae* JCM31915, and *Segatella copri* JCM13464, as determined by flow cytometry. Representative histograms are shown for *P. vulgatus*, *F. duncaniae*, and *S. copri* strains treated with (blue, green or red) or without (gray) the selected clone. Data are representative of two independent experiments. FITC, fluorescein isothiocyanate. (**C**) To identify whether distinct proteins were detected by the mAbs we isolated, we used them in western blotting against *Phocaeicola vulgatus* JCM5826. Representative images show the bands of lysates of *P. vulgatus* strains or a candidate target protein treated with selected clones. Data are representative of two independent experiments. The entire gel and blot are provided in the supplementary materials.

**Supplementary Fig. 5:** Quantitative detection of bacteriabased on sandwich ELISA with the combination of serum from immunized mice and the selected monoclonal antibody.

Mice were immunized with glutamate dehydrogenase (gdhA), a protein recognized by SC-S10C3-49K1, to prepare antibodies against gdhA. Sera were collected from gdhA-immunized mice and used as the detection antibody in sandwich ELISA to detect *Segatella copri* JCM13464. Data are representative of two independent experiments. SDS-PAGE, sodium dodecyl sulfate–polyacrylamide gel electrophoresis; WB, western blotting.

**Supplementary Table 1:** Profiles of proteome analysis in selected clones

Candidate proteins recognized by established monoclonal antibodies that were specifically reactive to representative bacteria of human gut microbiome enterotypes *Phocaeicola vulgatus* JCM5826, *Faecalibacterium duncaniae* JCM31915, and *Segatella copri* JCM13464, as determined by immunoprecipitation and proteome analysis. Proteome analysis data are shown for selected clones PV-L2B7-117K1, PV-L1A6-117K2, PV-S10F7-14K1, FD-S2D3-18K1, FD-L4F6-18K2, FD-L5B6-33K2, SC-S10C3-49K1, and SC-L10B5-35K1.
